# Supplementary material for: Reporter Virus Neutralization Test Evaluation for Dengue and Zika Virus Diagnosis in Flavivirus Endemic Area
Source: MDPI journal article supplement (doi:10.3390/pathogens10070840), 2021-07-03
Supplement: s1 [file s1]

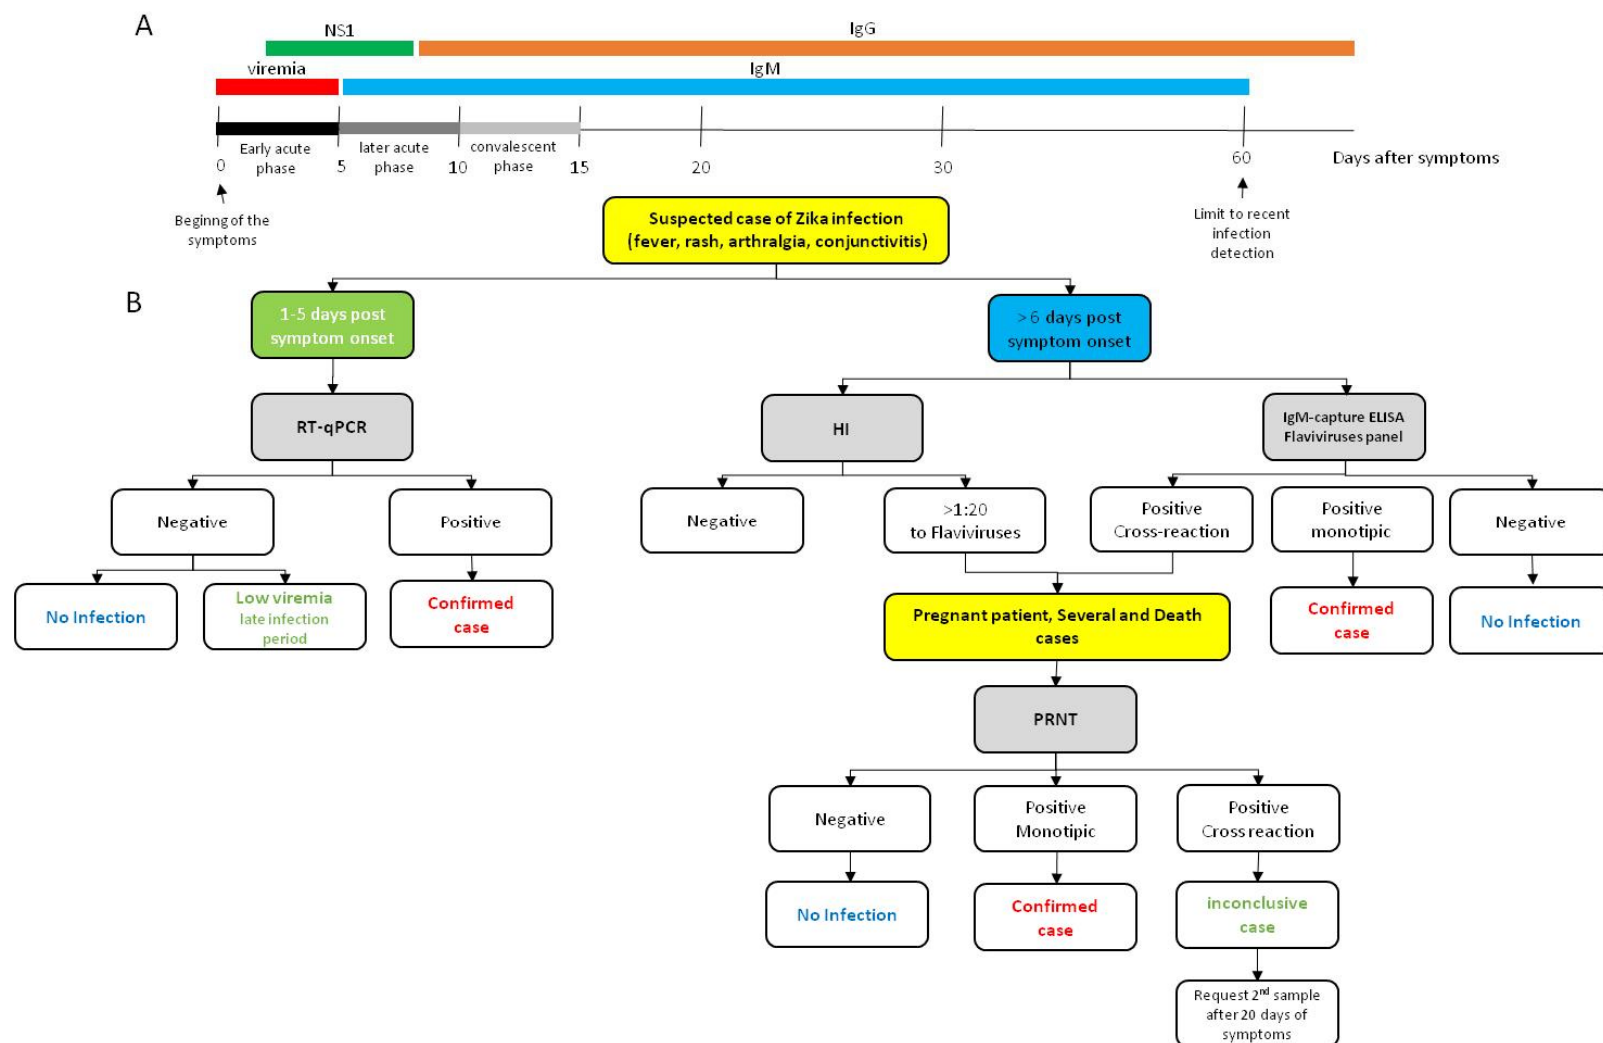

**Figure S1. Arbovirus diagnostic algorithm.** Diagnostic algorithm followed by the Department of Arbovirology and Hemorrhagic Fevers of Instituto Evandro Chagas, currently the national reference for arbovirus diagnostics in Brazil.

**Table S1.** Contingency table with the RVNT assays diagnostics predictive values. All RVNT assays were evaluated in comparison to the reference assay PRNT.

| Query     | Tests                        | PPV    | NPV   | Sensitivity (%) | Specificity (%) | Accuracy (%) | McNemar value     |
|-----------|------------------------------|--------|-------|-----------------|-----------------|--------------|-------------------|
| PRNT90    | DENV RVNT <sub>90</sub> Rluc | 91.2   | 100   | 100             | 78.3            | 93.3         | 0.218<br>(p>0,05) |
|           | RVNT <sub>90</sub> Rluc      | 32.0   | 100.0 | 100.0           | 74.6            | 77.3         | 0.000<br>(p<0,05) |
|           | RVNT <sub>90</sub> mCherry   | 33.3   | 98.1  | 88,00           | 79.10           | 80.0         | 0.001<br>(p<0,05) |
| ZIKV Rluc | RVNT <sub>90</sub> mCherry   | 100.00 | 92.59 | 84.0            | 100.0           | 94.7         | 0.125<br>(p>0,05) |
